# Supplementary material for: Dynamics of male meiotic recombination frequency during plant development using Fluorescent Tagged Lines in Arabidopsis thaliana
Source: PubMed Central journal article supplement (PMC5304153; doi:10.1038/srep42535), 2017-02-13
Supplement: srep42535-s1.pdf [file srep42535-s1.pdf]

## Supplementary Figures

### **Dynamics of male meiotic recombination frequency during plant development using Fluorescent Tagged Lines in *Arabidopsis thaliana***

Fan Li, Nico De Storme, and Danny Geelen\*

*In vitro* Biology and Horticulture, Department of Plant Production, Faculty of Bioscience Engineering, Ghent University, Ghent, 9000, Belgium

\*corresponding. [Danny.Geelen@UGent.be](mailto:Danny.Geelen@UGent.be)

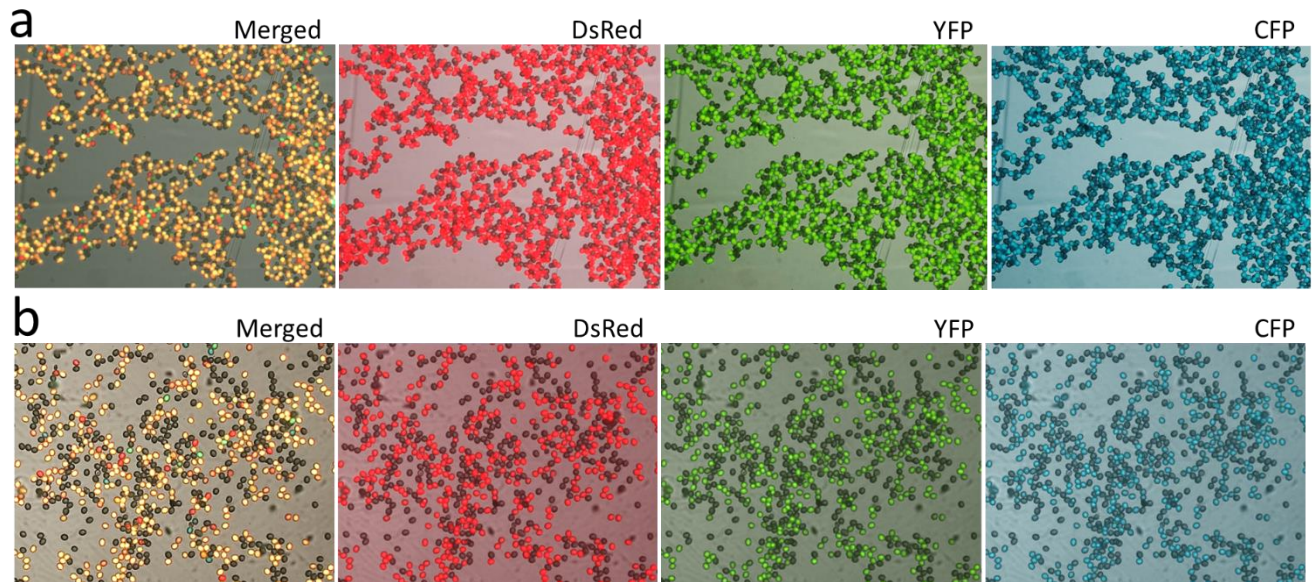

**Figure S1.** Micrographs of fluorescent pollen segregating for *I2ab* FTL T-DNAs. (a) Micrographs of *I2ab/+++ qrt1-2<sup>-/-</sup>* fluorescent tetrad pollens taken under DsRed, eYFP, and eCFP filters in bright field (BF), and a merged image. (b) Micrographs of *I2ab/+++* single pollens taken under DsRed, eYFP, and eCFP filters in BF background. A merged image also shown.

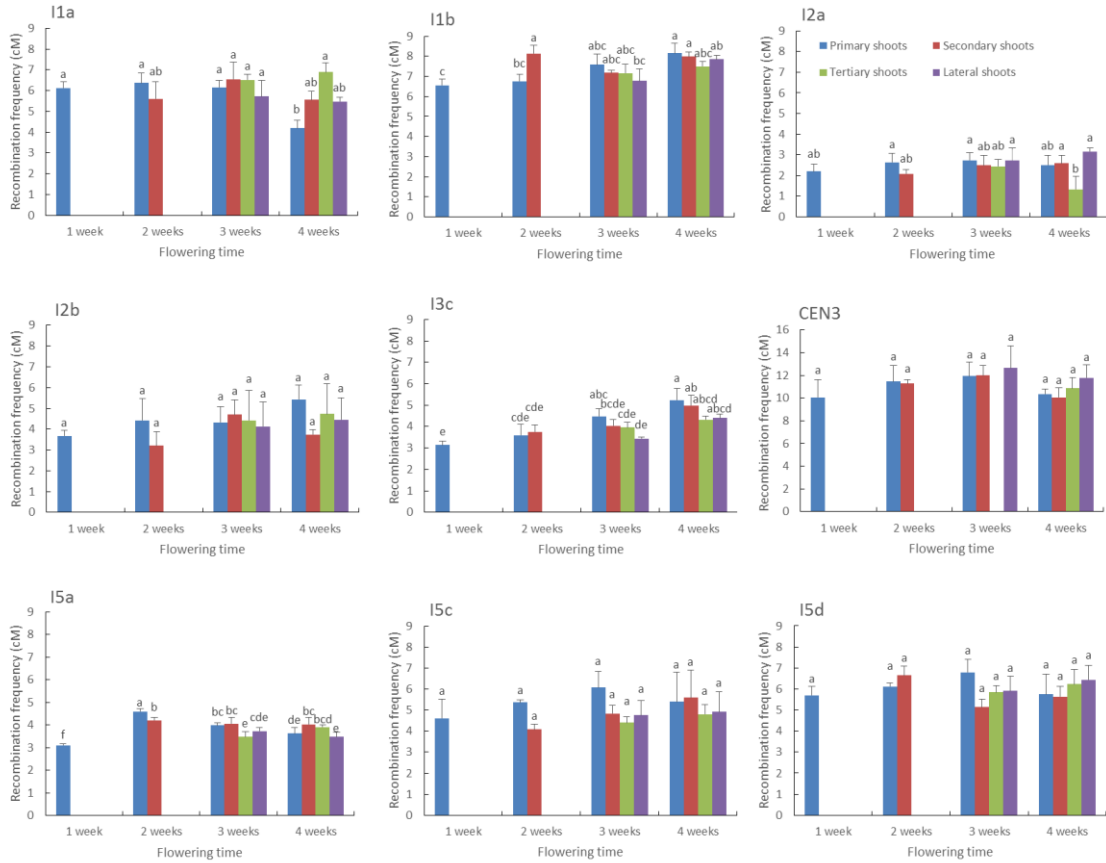

**Figure S2.** Male meiotic recombination frequency in different genomic intervals during the development of different shoot types in *Arabidopsis thaliana*. Statistical significance was analyzed based on one-way ANOVA [I1a ( $F=6.0840$ ,  $p=0.0002$ ), I1b ( $F=6.8380$ ,  $p=0.0001$ ), I2a ( $F=3.5920$ ,  $p=0.0059$ ), I2b ( $F=1.1990$ ,  $p=0.3436$ ), I3c ( $F=10.9220$ ,  $p=0.0001$ ), CEN3 ( $F=1.6920$ ,  $p=0.1567$ ), I5a ( $F=13.8560$ ,  $p=0.0001$ ), I5c ( $F=1.5650$ ,  $p=0.1829$ ) and I5d ( $F=2.1600$ ,  $p=0.0636$ ),  $p$  value was calculated with post-hoc Tukey HSD test ( $\alpha=0.05$ )].
